# Supplementary material for: Plasma membrane expression of G protein-coupled estrogen receptor (GPER)/G protein-coupled receptor 30 (GPR30) is associated with worse outcome in metachronous contralateral breast cancer
Source: PubMed Central journal article supplement (PMC7164601; doi:10.1371/journal.pone.0231786), 2020-04-17
Supplement: pone.0231786.s007.pdf [file pone.0231786.s007.pdf]

|                            |                           | Unadjusted |     |        |          |                        | Adjusted for BC1 <sup>1</sup> |      |     |        |           | Adjusted for BC1 and BC2 <sup>2</sup> |      |     |        |          |                        |
|----------------------------|---------------------------|------------|-----|--------|----------|------------------------|-------------------------------|------|-----|--------|-----------|---------------------------------------|------|-----|--------|----------|------------------------|
| Patient group              |                           | HR         | n   | Events | 95% CI   | <i>p</i> <sub>HR</sub> | <i>p</i> <sub>i</sub>         | HR   | n   | Events | 95% CI    | <i>p</i> <sub>HR</sub>                | HR   | n   | Events | 95% CI   | <i>p</i> <sub>HR</sub> |
| <b>GPR30<sub>TOI</sub></b> | ER+ BC2                   | 1.2        | 492 | 177    | 0.86-1.8 | 0.2                    | 0.7                           | 0.95 | 349 | 126    | 0.59-1.5  | 0.8                                   | 1.1  | 282 | 105    | 0.66-1.9 | 0.7                    |
|                            | ER- BC2                   | 1.1        | 99  | 60     | 0.63-1.9 | 0.8                    |                               | 1.4  | 75  | 45     | 0.74-2.7  | 0.3                                   | 3.0  | 67  | 40     | 1.4-6.6  | 0.006                  |
|                            | ER+, tamoxifen for BC2    | 1.4        | 70  | 35     | 0.60-3.5 | 0.4                    | 0.4                           | 0.55 | 123 | 45     | 0.18-1.6  | 0.3                                   | 1.1  | 45  | 24     | 0.30-4.0 | 0.26                   |
|                            | ER+, no tamoxifen for BC2 | 1.3        | 48  | 26     | 0.39-4.4 | 0.7                    |                               | 1.1  | 224 | 79     | 0.94-1.9  | 0.8                                   | 7.9  | 35  | 21     | 1.1-60   | 0.04                   |
| <b>GPR30<sub>PM</sub></b>  | ER+ BC2                   | 1.8        | 492 | 177    | 0.88-3.6 | 0.1                    | 0.1                           | 1.8  | 349 | 126    | 0.80-3.9  | 0.2                                   | 1.9  | 282 | 105    | 0.76-4.5 | 0.2                    |
|                            | ER- BC2                   | 0.87       | 99  | 60     | 0.45-1.7 | 0.7                    |                               | 1.1  | 75  | 45     | 0.47-2.4  | 0.8                                   | 1.3  | 67  | 40     | 0.55-3.2 | 0.5                    |
|                            | ER+, tamoxifen for BC2    | 0.51       | 180 | 63     | 0.07-3.7 | 0.5                    | 0.3                           | 0.27 | 123 | 45     | 0.030-2.5 | 0.3                                   | 0.57 | 104 | 40     | 0.06-5.3 | 0.6                    |
|                            | ER+, no tamoxifen for BC2 | 2.8        | 310 | 112    | 1.3-6.0  | 0.01                   |                               | 2.2  | 224 | 79     | 0.90-5.6  | 0.08                                  | 3.8  | 176 | 63     | 1.4-11   | 0.01                   |

<sup>1</sup> Adjusted for GPR30 intensity, age and calendar interval of diagnosis, tumor size, node status, HER2 status and Ki67 staining of BC1. <sup>2</sup> Adjusted for GPR30 intensity, size, node status, HER2 status and ki67 staining of BC1 and BC2, as well as age and calendar interval at BC2 diagnosis and interval between BC1 and BC2.

*p*<sub>i</sub>: *p*<sub>interaction</sub>. Level of evidence that GPR30 has different effect in the compared groups.
